# Supplementary material
Source: PubMed Central journal article supplement (PMC4933606)
Supplement: supp_4.2.E264_STROBE_checklist.pdf [file supp_4.2.E264_STROBE_checklist.pdf]

**Checklist of recommendations for reporting of observational studies using the STROBE guidelines**

|                          | Item No | Recommendation                                                                                                                                                                       | Reported                                   |
|--------------------------|---------|--------------------------------------------------------------------------------------------------------------------------------------------------------------------------------------|--------------------------------------------|
| Title and abstract       | 1       | (a) Indicate the study's design with a commonly used term in the title or the abstract                                                                                               | Abstract                                   |
|                          |         | (b) Provide in the abstract an informative and balanced summary of what was done and what was found                                                                                  | Abstract                                   |
| <b>Introduction</b>      |         |                                                                                                                                                                                      |                                            |
| Background/rationale     | 2       | Explain the scientific background and rationale for the investigation being reported                                                                                                 | Introduction                               |
| Objectives               | 3       | State specific objectives, including any pre-specified hypotheses                                                                                                                    | Introduction                               |
| <b>Methods</b>           |         |                                                                                                                                                                                      |                                            |
| Study design             | 4       | Present key elements of study design early in the paper                                                                                                                              | Methods                                    |
| Setting                  | 5       | Describe the setting, locations, and relevant dates, including periods of recruitment, exposure, follow-up, and data collection                                                      | Methods                                    |
| Participants             | 6       | (a) Give the eligibility criteria, and the sources and methods of selection of participants. Describe methods of follow-up                                                           | Methods                                    |
|                          |         | (b) For matched studies, give matching criteria and number of exposed and unexposed                                                                                                  | Methods                                    |
| Variables                | 7       | Clearly define all outcomes, exposures, predictors, potential confounders, and effect modifiers. Give diagnostic criteria, if applicable                                             | Methods                                    |
| Data sources/measurement | 8       | For each variable of interest, give sources of data and details of methods of assessment (measurement). Describe comparability of assessment methods if there is more than one group | Methods, Supplement Tables 3, 4            |
| Bias                     | 9       | Describe any efforts to address potential sources of bias                                                                                                                            | Discussion                                 |
| Study size               | 10      | Explain how the study size was arrived at                                                                                                                                            | Methods, based on availability of the data |
| Quantitative variables   | 11      | Explain how quantitative variables were handled in the analyses. If applicable, describe which groupings were chosen and why                                                         | Methods                                    |

|                     |    |                                                                                                                                                                                                               |                                        |
|---------------------|----|---------------------------------------------------------------------------------------------------------------------------------------------------------------------------------------------------------------|----------------------------------------|
| Statistical methods | 12 | (a) Describe all statistical methods, including those used to control for confounding                                                                                                                         | Methods                                |
|                     |    | (b) Describe any methods used to examine subgroups and interactions                                                                                                                                           | Not Applicable                         |
|                     |    | (c) Explain how missing data were addressed                                                                                                                                                                   | Not Applicable                         |
|                     |    | (d) If applicable, explain how loss to follow-up was addressed                                                                                                                                                | Not Applicable                         |
|                     |    | (e) Describe any sensitivity analyses                                                                                                                                                                         | Results                                |
| <b>Results</b>      |    |                                                                                                                                                                                                               |                                        |
| Participants        | 13 | (a) Report numbers of individuals at each stage of study—e.g. numbers potentially eligible, examined for eligibility, confirmed eligible, included in the study, completing follow-up, and analyzed           | Results, Figure 1, 2                   |
|                     |    | (b) Give reasons for non-participation at each stage                                                                                                                                                          | Methods, Figure 1, 2                   |
|                     |    | (c) Consider use of a flow diagram                                                                                                                                                                            | Figure 1, 2                            |
| Descriptive data    | 14 | (a) Give characteristics of study participants (e.g. demographic, clinical, social) and information on exposures and potential confounders                                                                    | Results, Table 1, Supplement Table 6   |
|                     |    | (b) Indicate number of participants with missing data for each variable of interest                                                                                                                           | Results                                |
|                     |    | (c) Summarize follow-up time (e.g. average and total amount)                                                                                                                                                  | Results                                |
| Outcome data        | 15 | Report numbers of outcome events or summary measures over time                                                                                                                                                | Results                                |
| Main results        | 16 | (a) Give unadjusted estimates and, if applicable, confounder-adjusted estimates and their precision (e.g. 95% confidence interval). Make clear which confounders were adjusted for and why they were included | Results, Table 2                       |
|                     |    | (b) Report category boundaries when continuous variables were categorized                                                                                                                                     | Table 1, Supplement Table 6            |
|                     |    | (c) If relevant, consider translating estimates of relative risk into absolute risk for a meaningful time period                                                                                              | Results, Table 2                       |
| Other analyses      | 17 | Report other analyses done—e.g. analyses of subgroups and interactions, and sensitivity analyses                                                                                                              | Results, Supplement Tables 7, 8, 9, 10 |
| <b>Discussion</b>   |    |                                                                                                                                                                                                               |                                        |
| Key results         | 18 | Summarize key results with reference to study objectives                                                                                                                                                      | Discussion                             |
| Limitations         | 19 | Discuss limitations of the study, taking into account sources of potential bias or imprecision. Discuss both direction and magnitude of any potential bias                                                    | Discussion                             |

|                          |    |                                                                                                                                                                            |             |
|--------------------------|----|----------------------------------------------------------------------------------------------------------------------------------------------------------------------------|-------------|
| Interpretation           | 20 | Give a cautious overall interpretation of results considering objectives, limitations, multiplicity of analyses, results from similar studies, and other relevant evidence | Discussion  |
| Generalizability         | 21 | Discuss the generalizability (external validity) of the study results                                                                                                      | Discussion  |
| <b>Other information</b> |    |                                                                                                                                                                            |             |
| Funding                  | 22 | Give the source of funding and the role of the funders for the present study and, if applicable, for the original study on which the present article is based              | Disclosures |
